# Supplementary material
Source: publisher site journal article supplement (https://www.dovepress.com/article/428036)
Supplement: Supplementary file 1 [file get_supplementary_file.php]

Appendices

A Calibration plots models


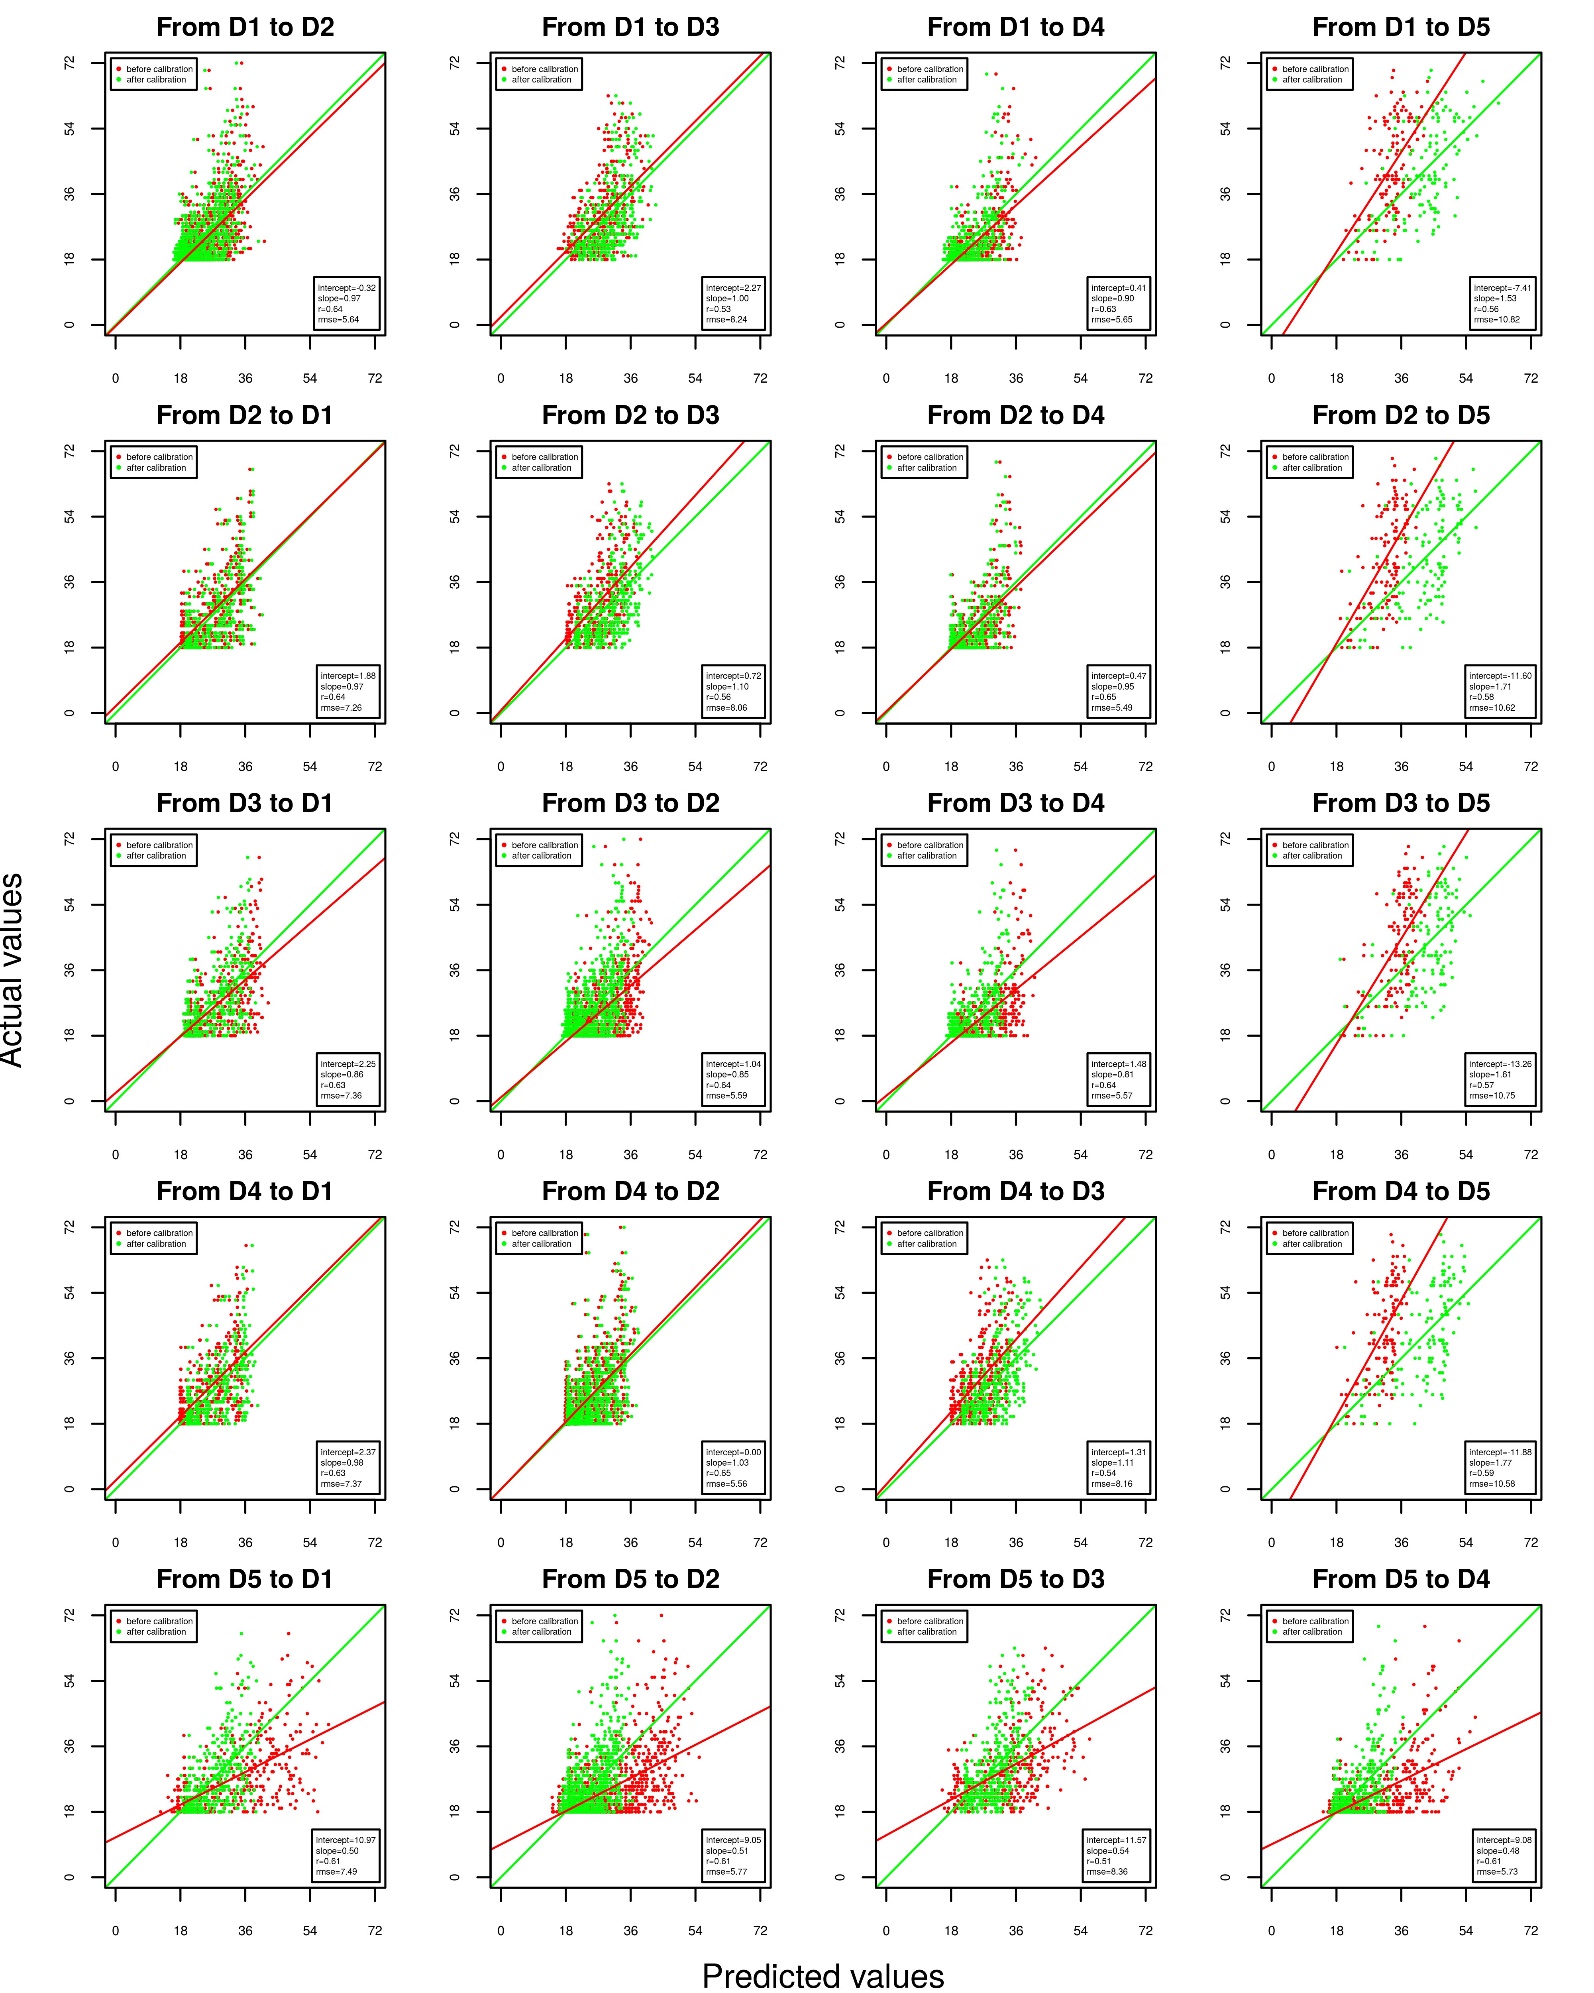


Figure S1: GLM models


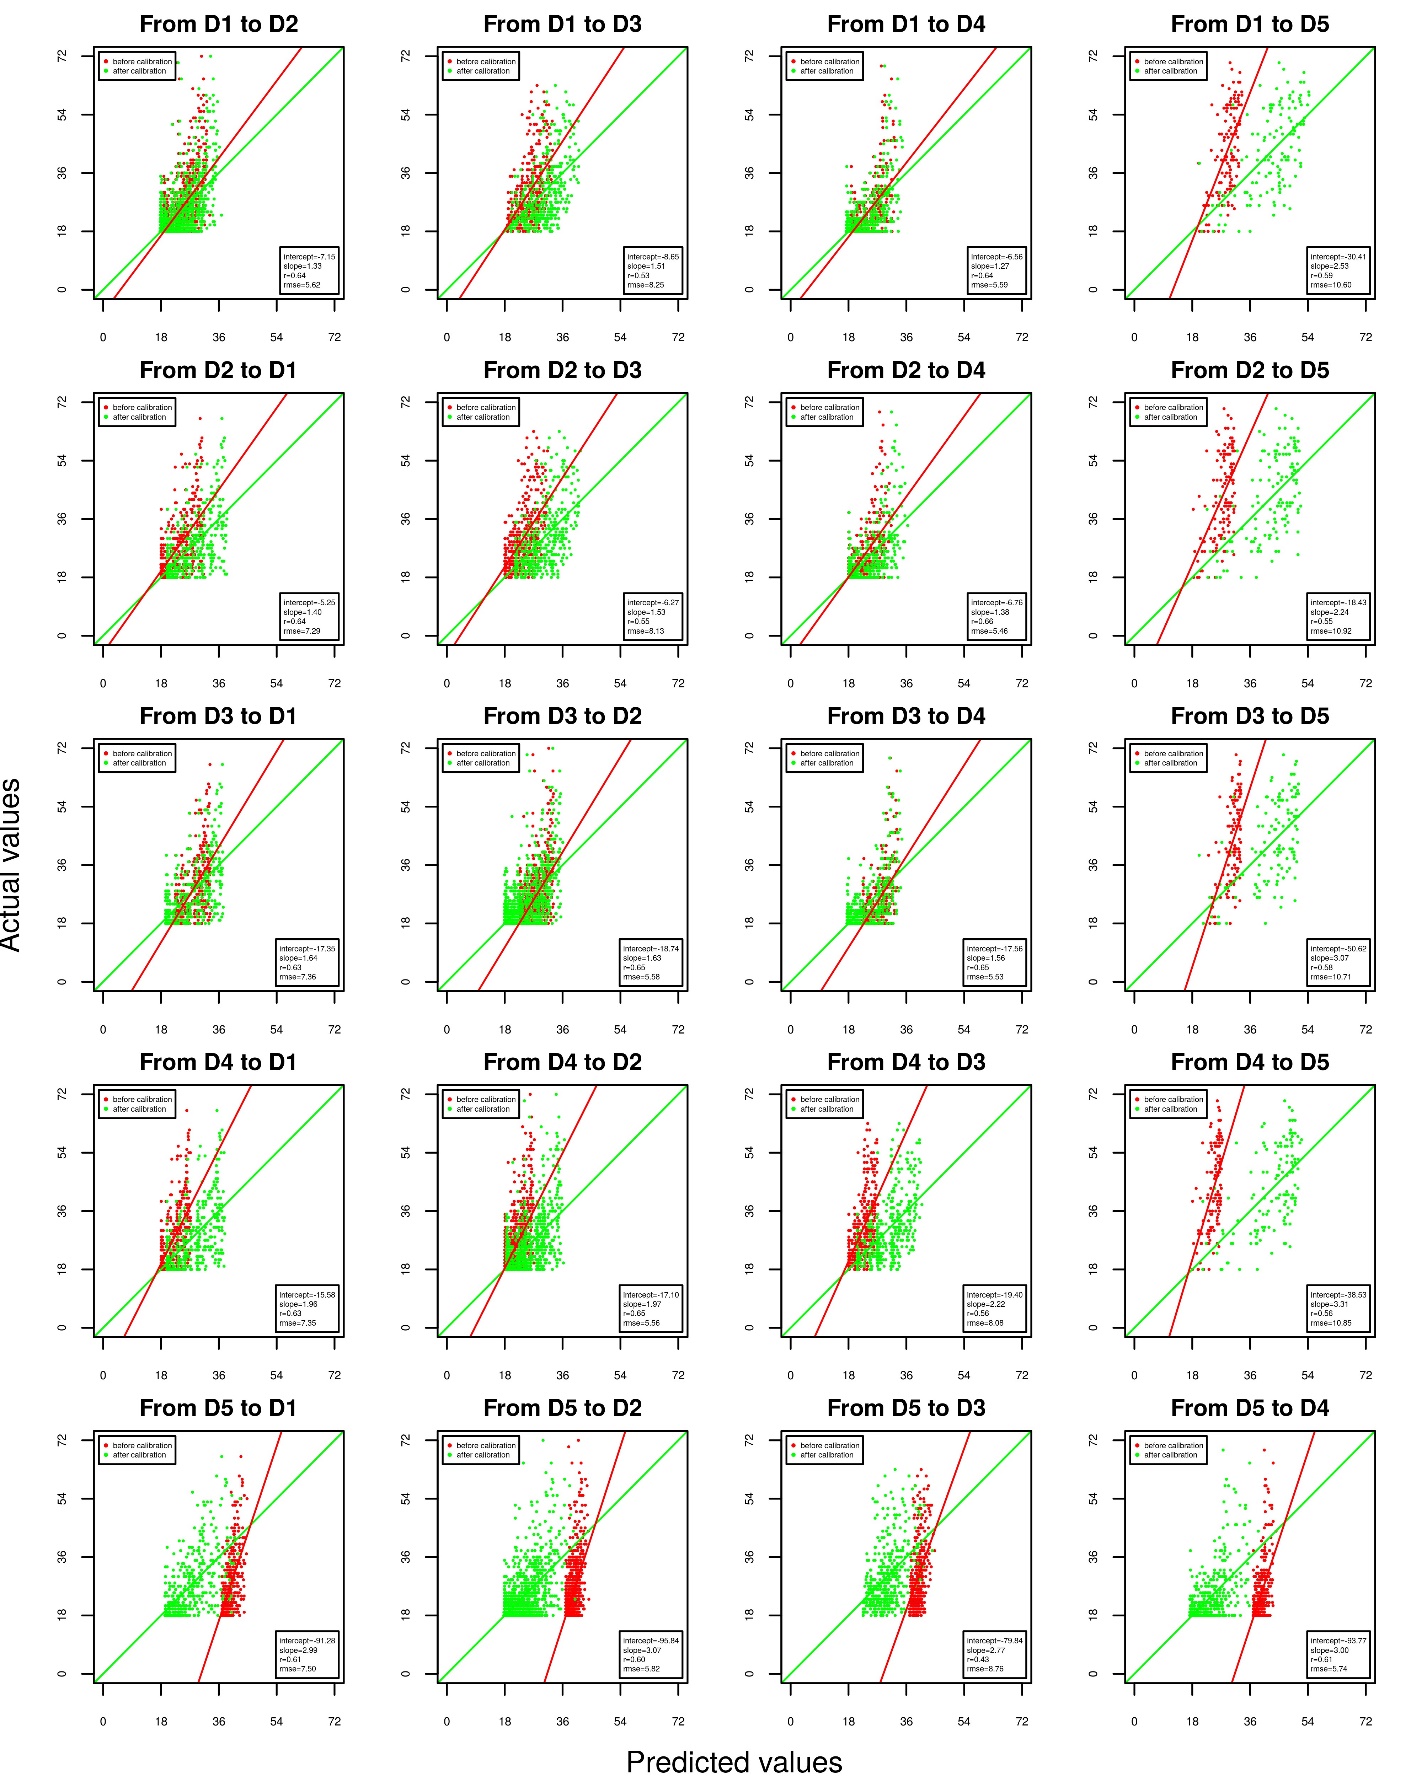


Figure S2: SVM models


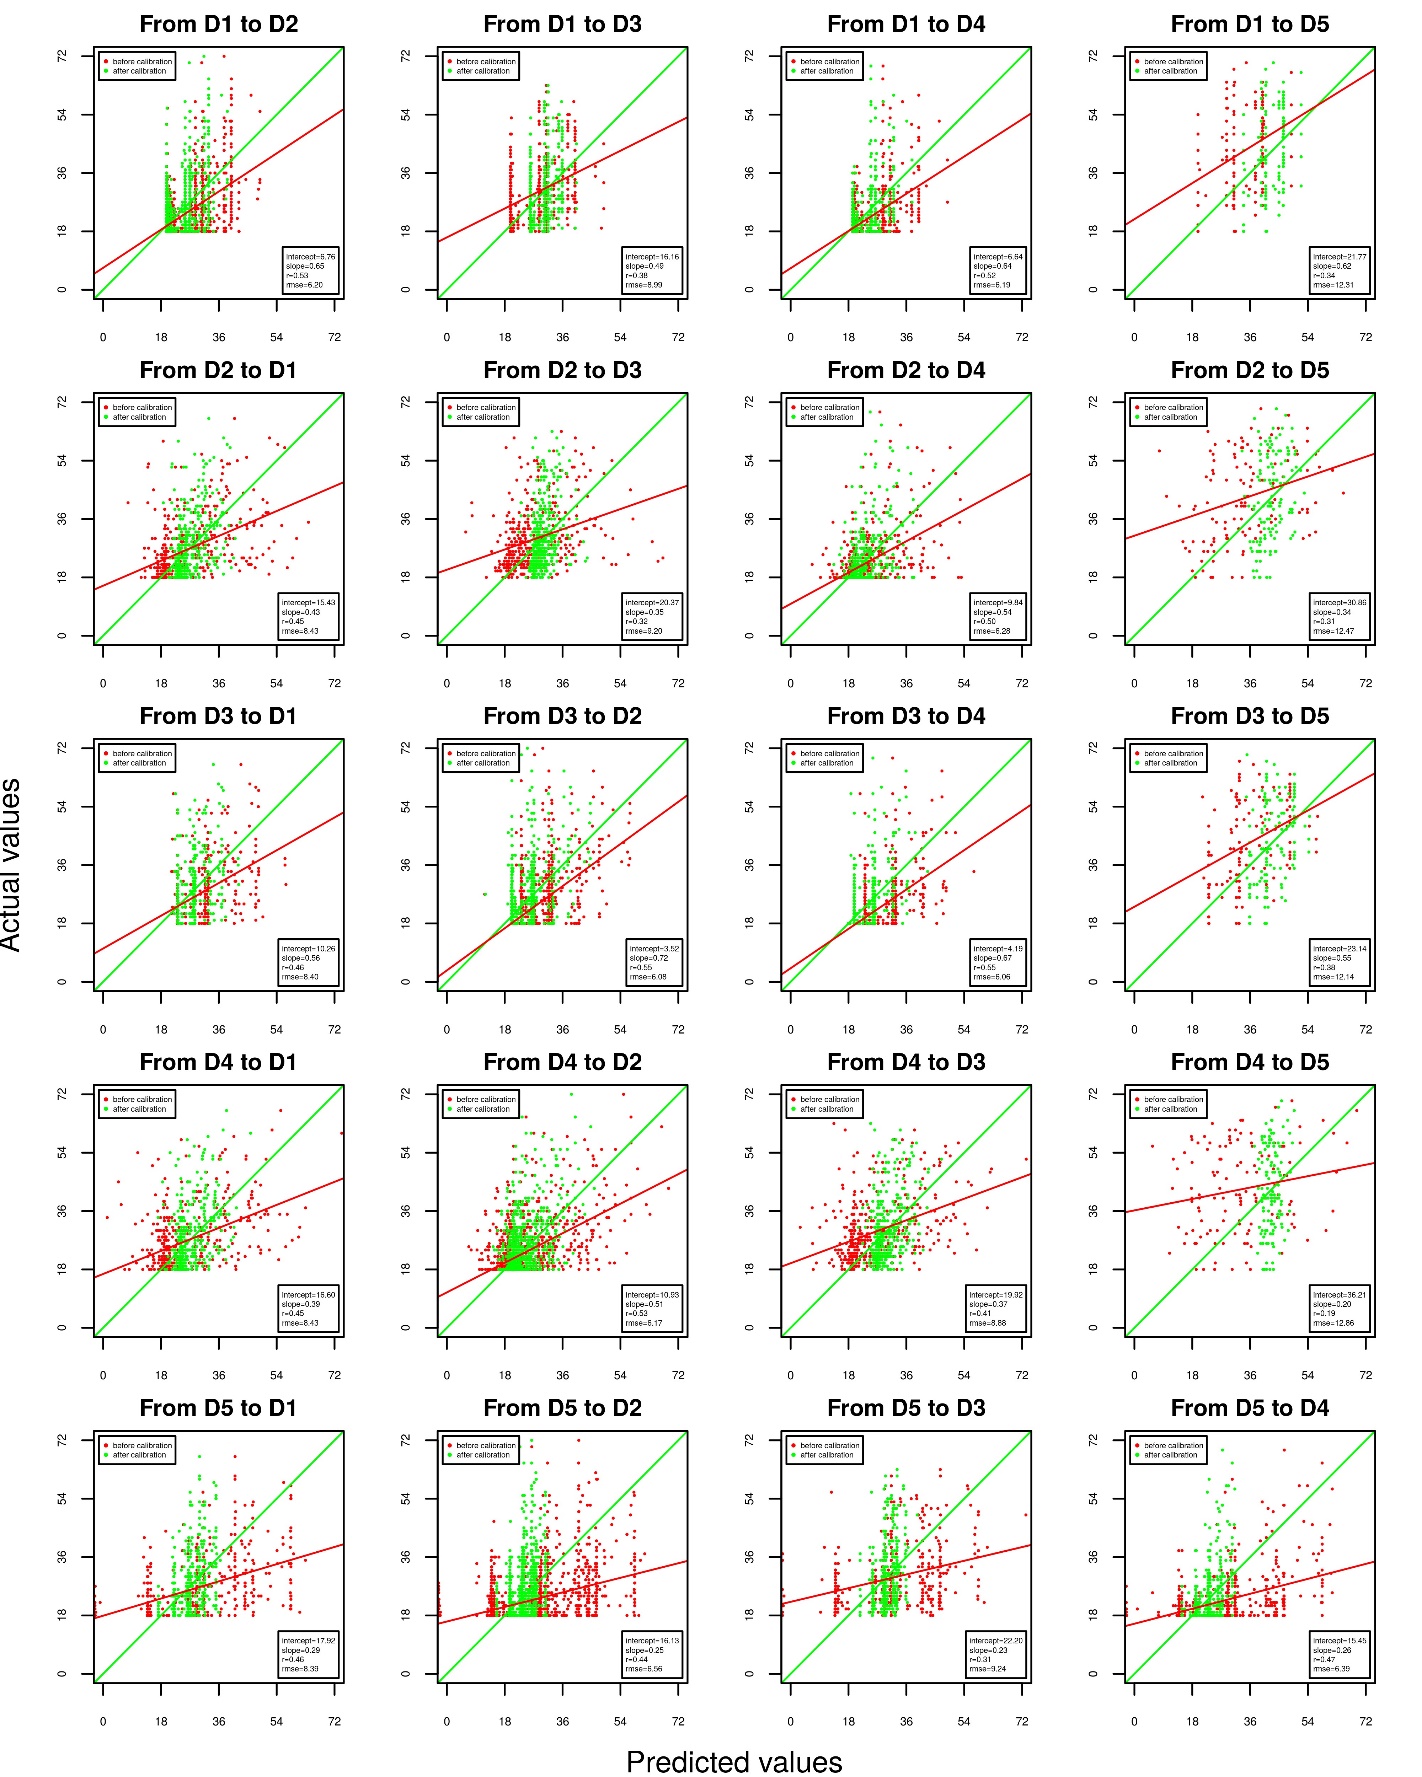


Figure S3: NN models


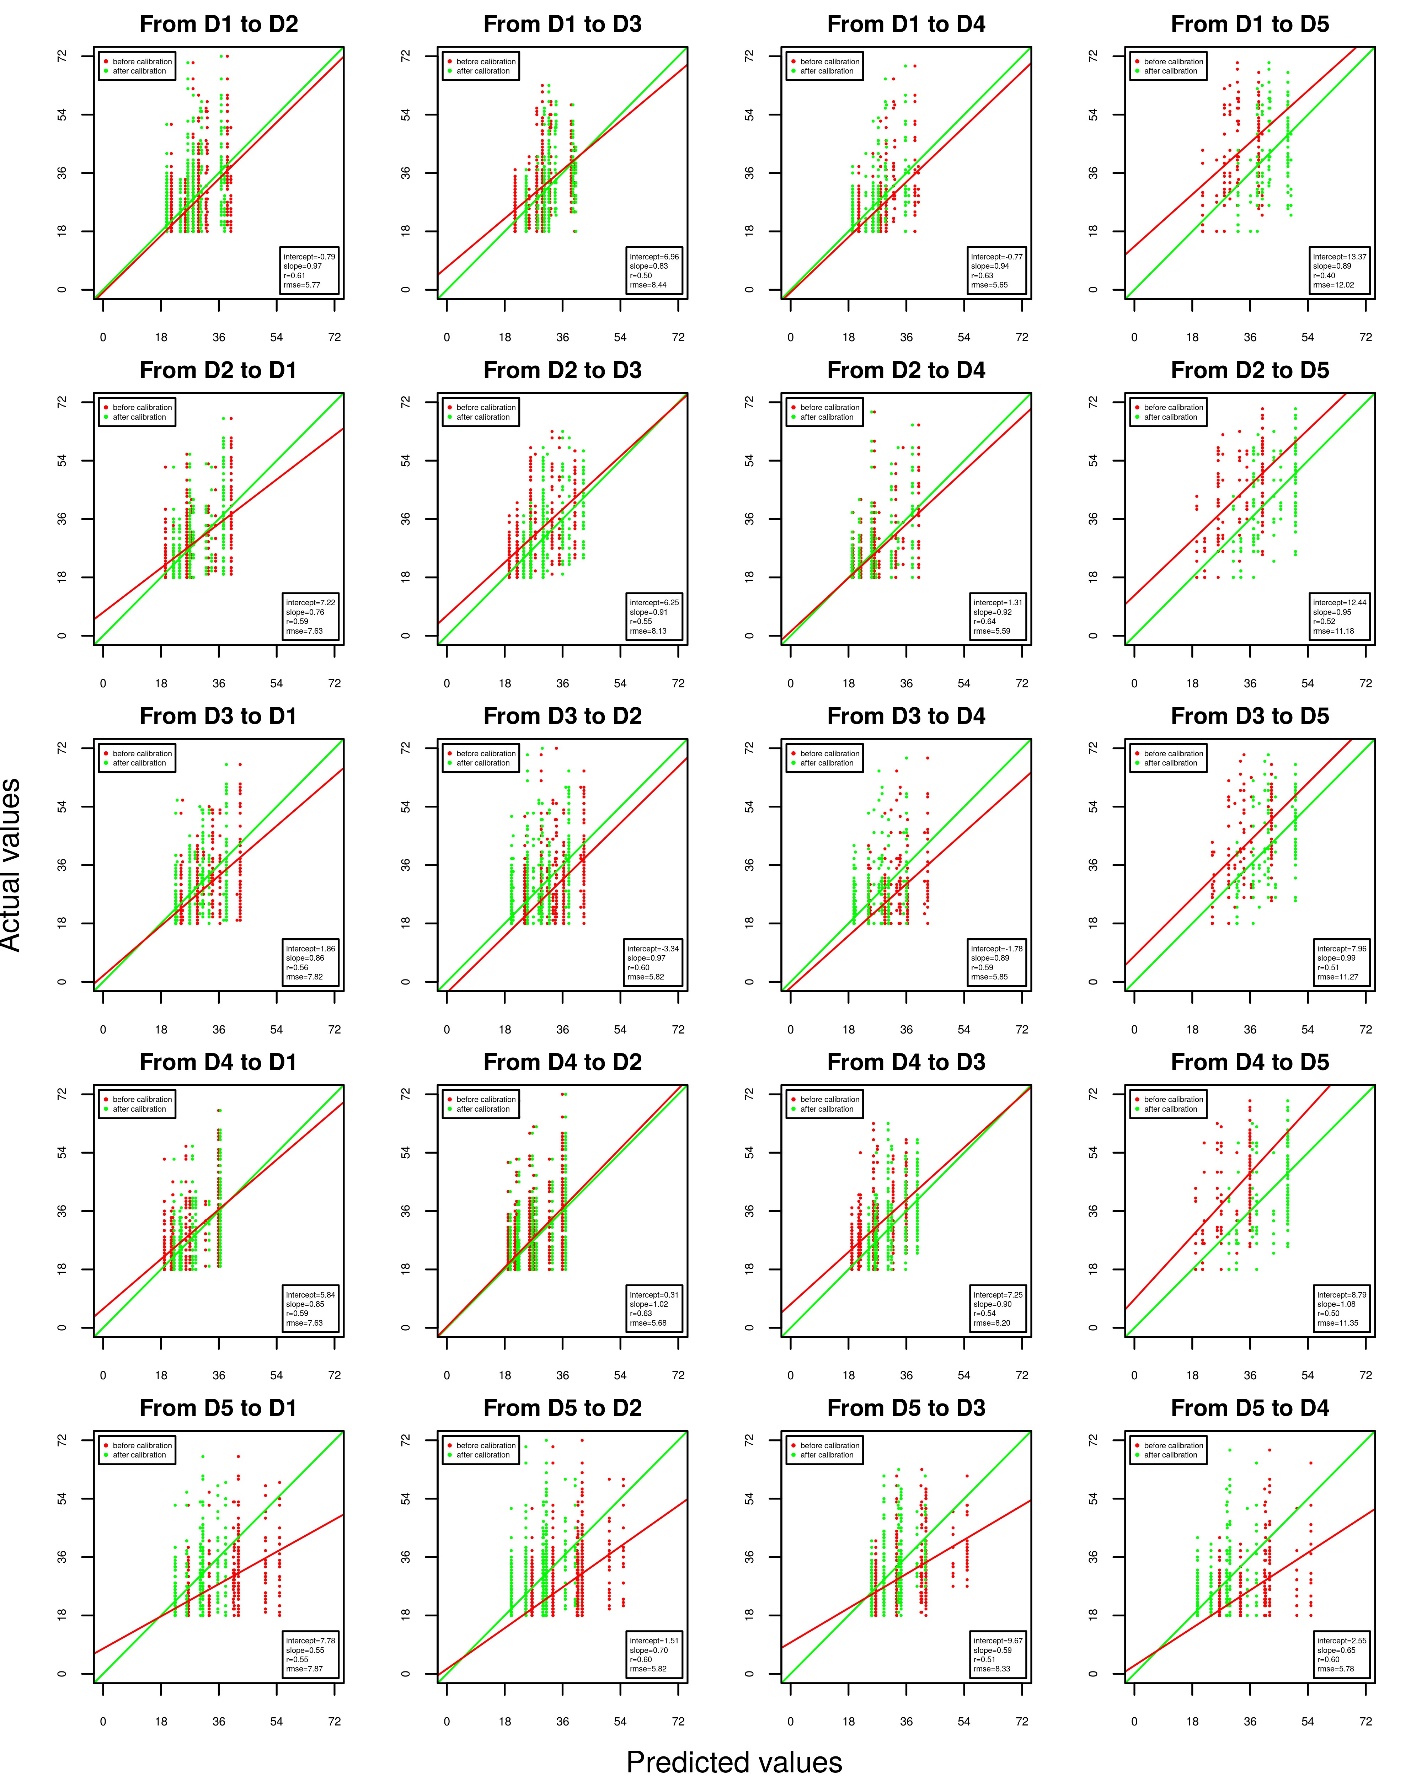


Figure S4: RP models


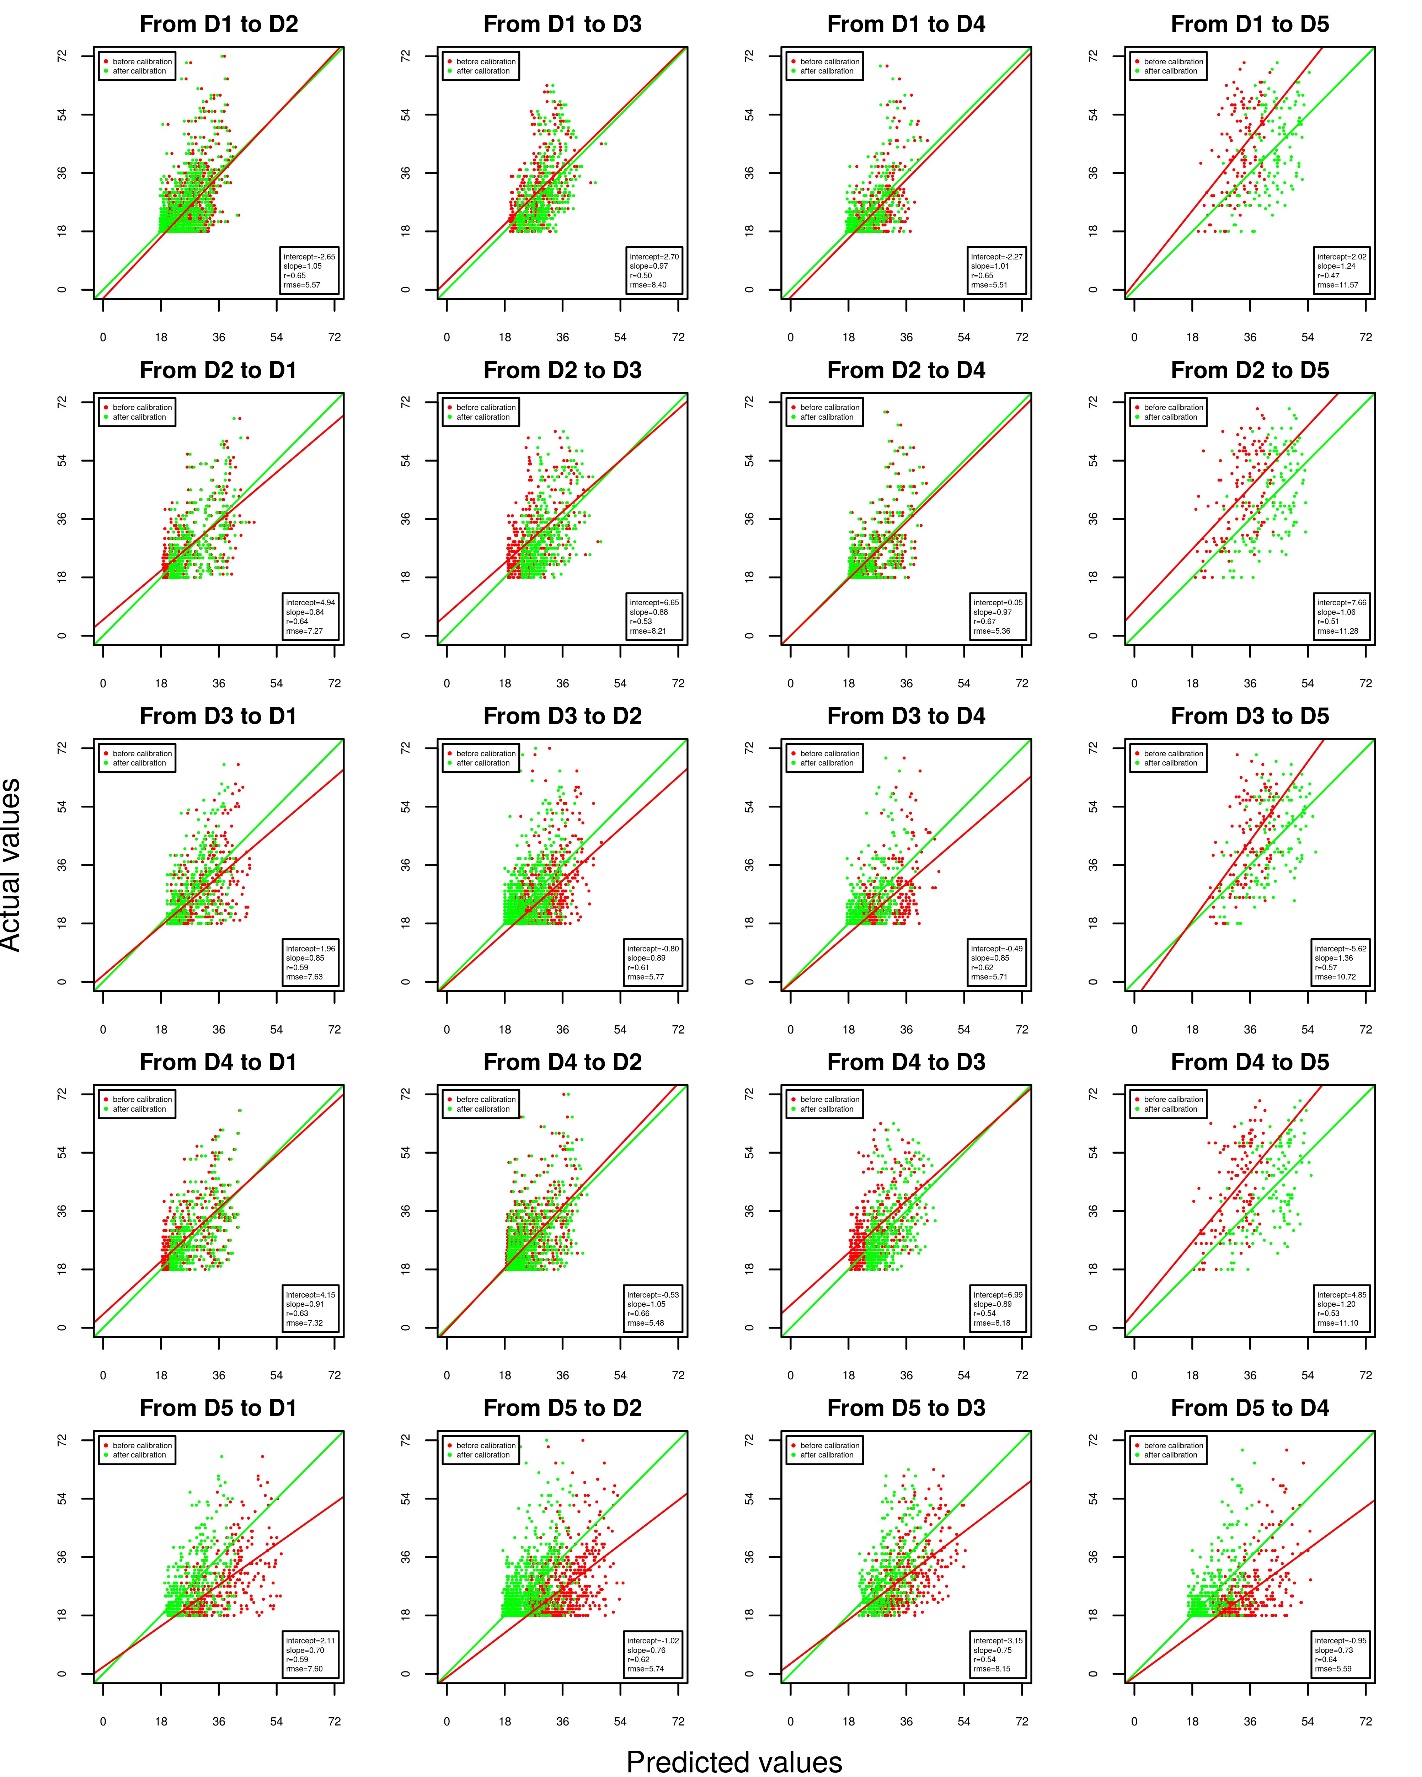


Figure S5: RF models
